# Supplementary material
Source: PubMed Central journal article supplement (PMC5020909)

Fig. S1

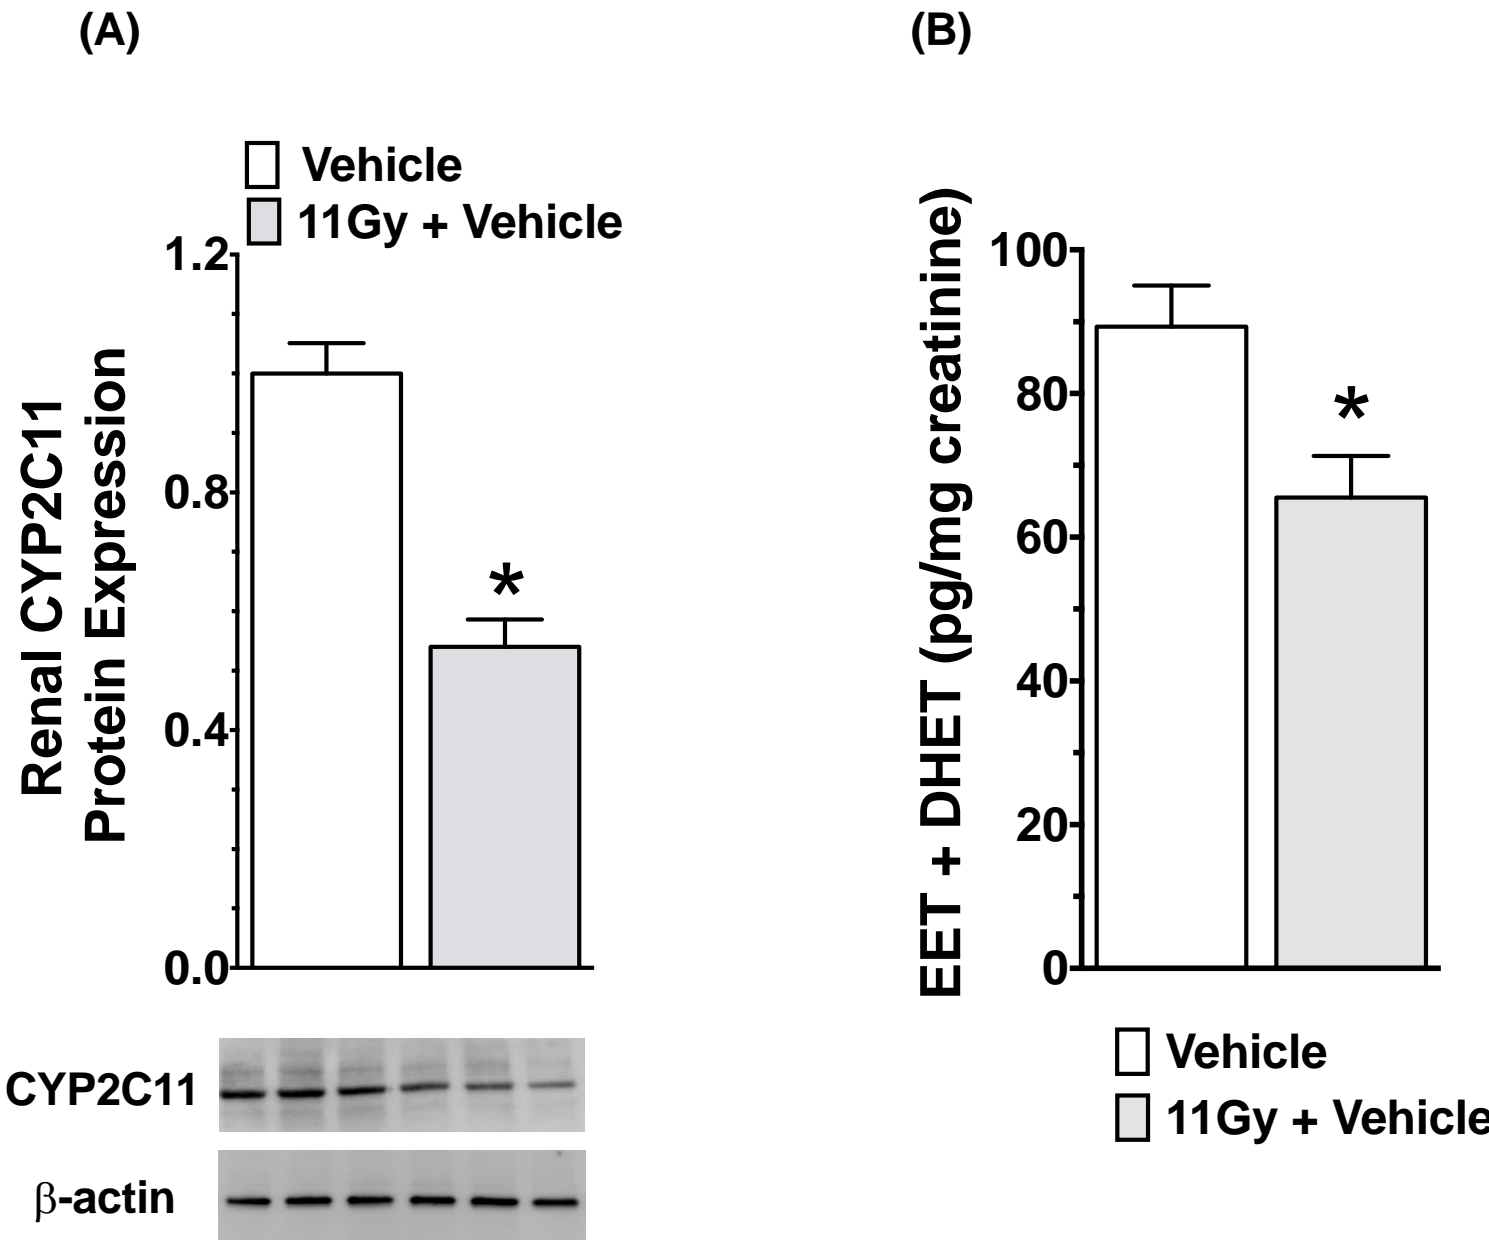

Fig. S2

(A)

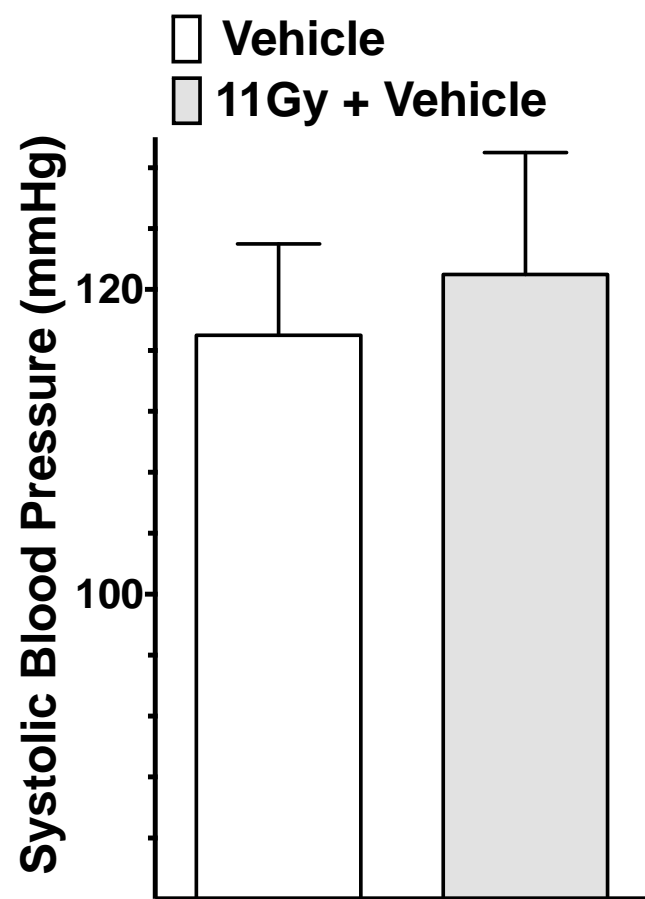

(B)

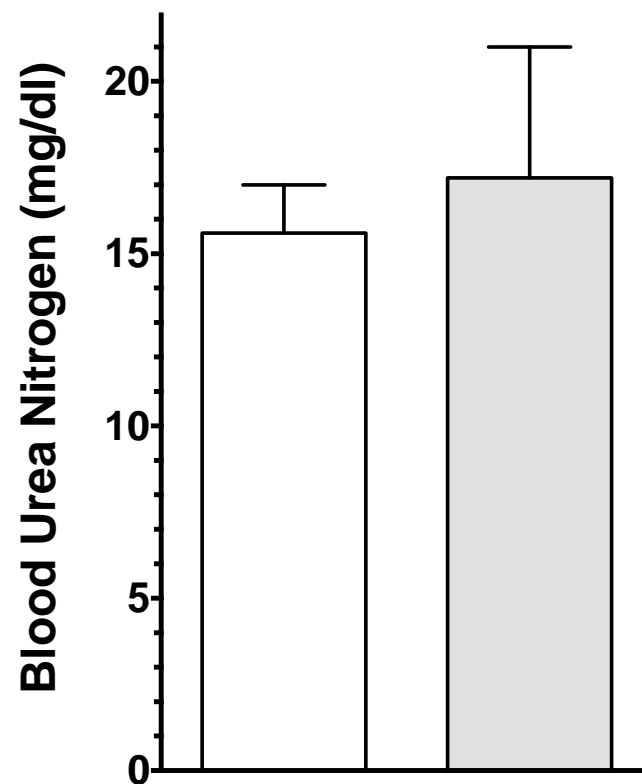

Fig. S3

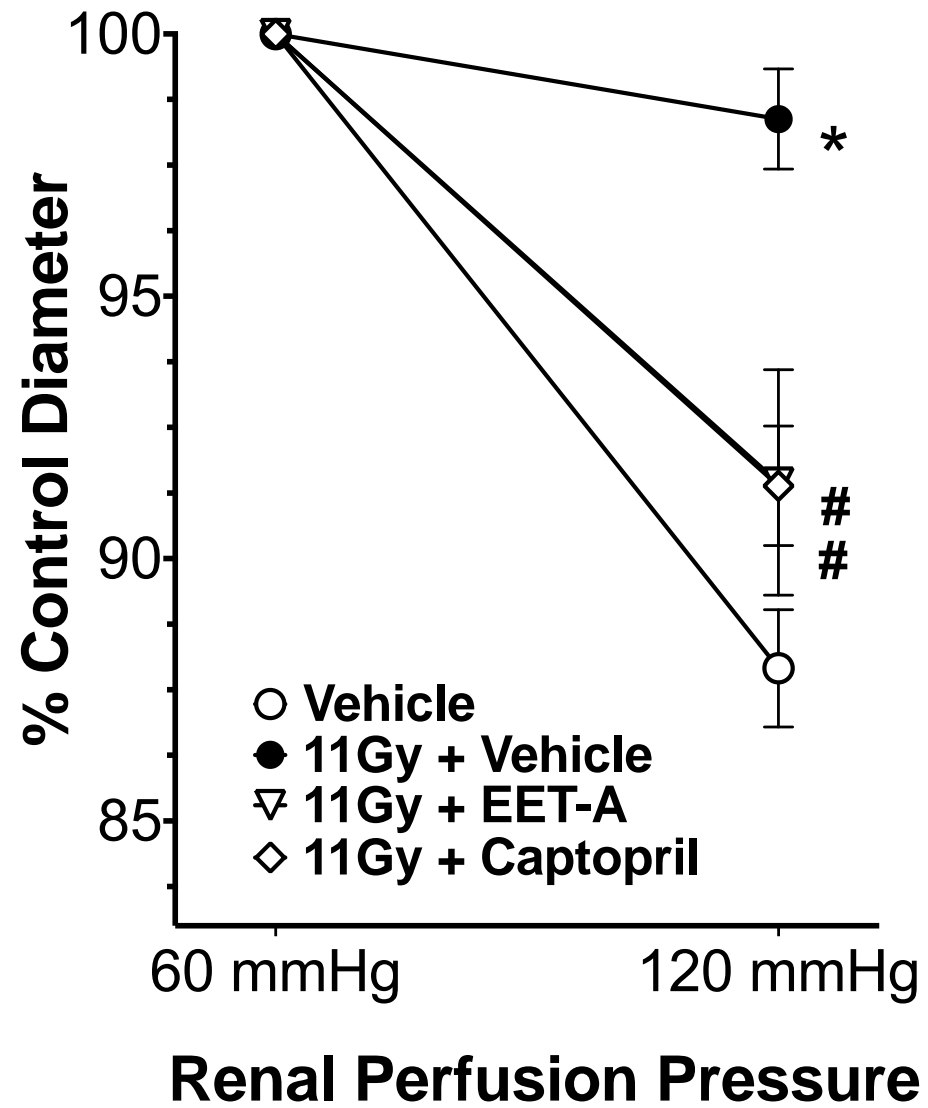

**Fig. S4**

**(A)**

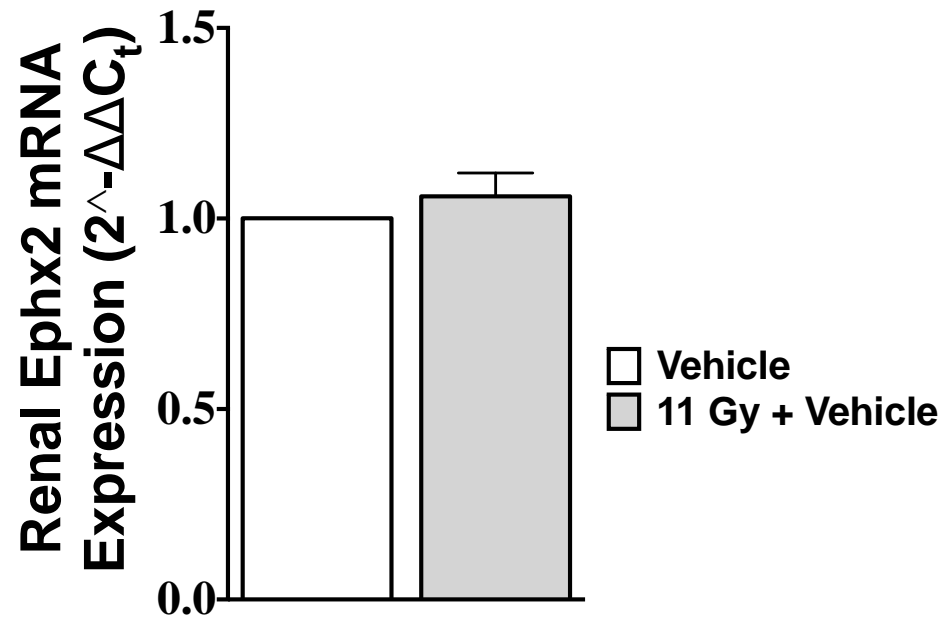

**(B)**

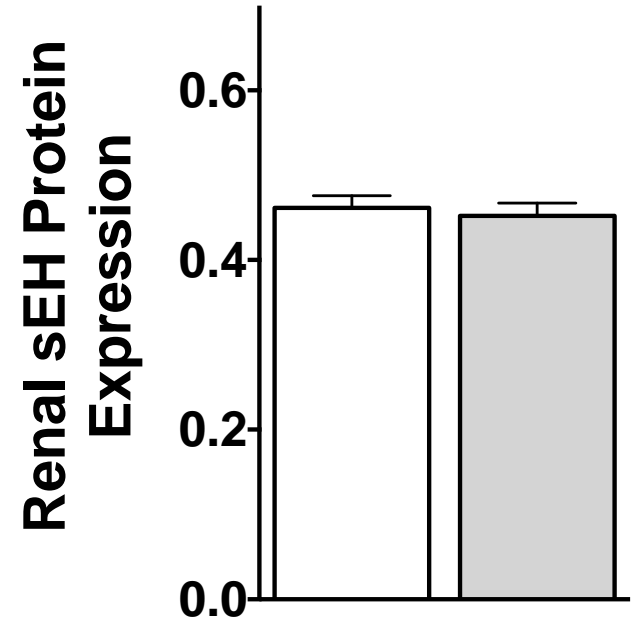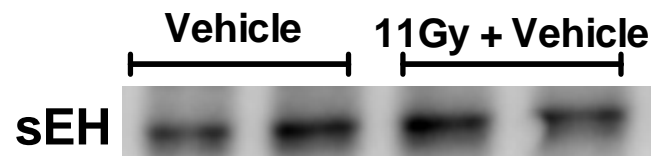

**Fig. S5**

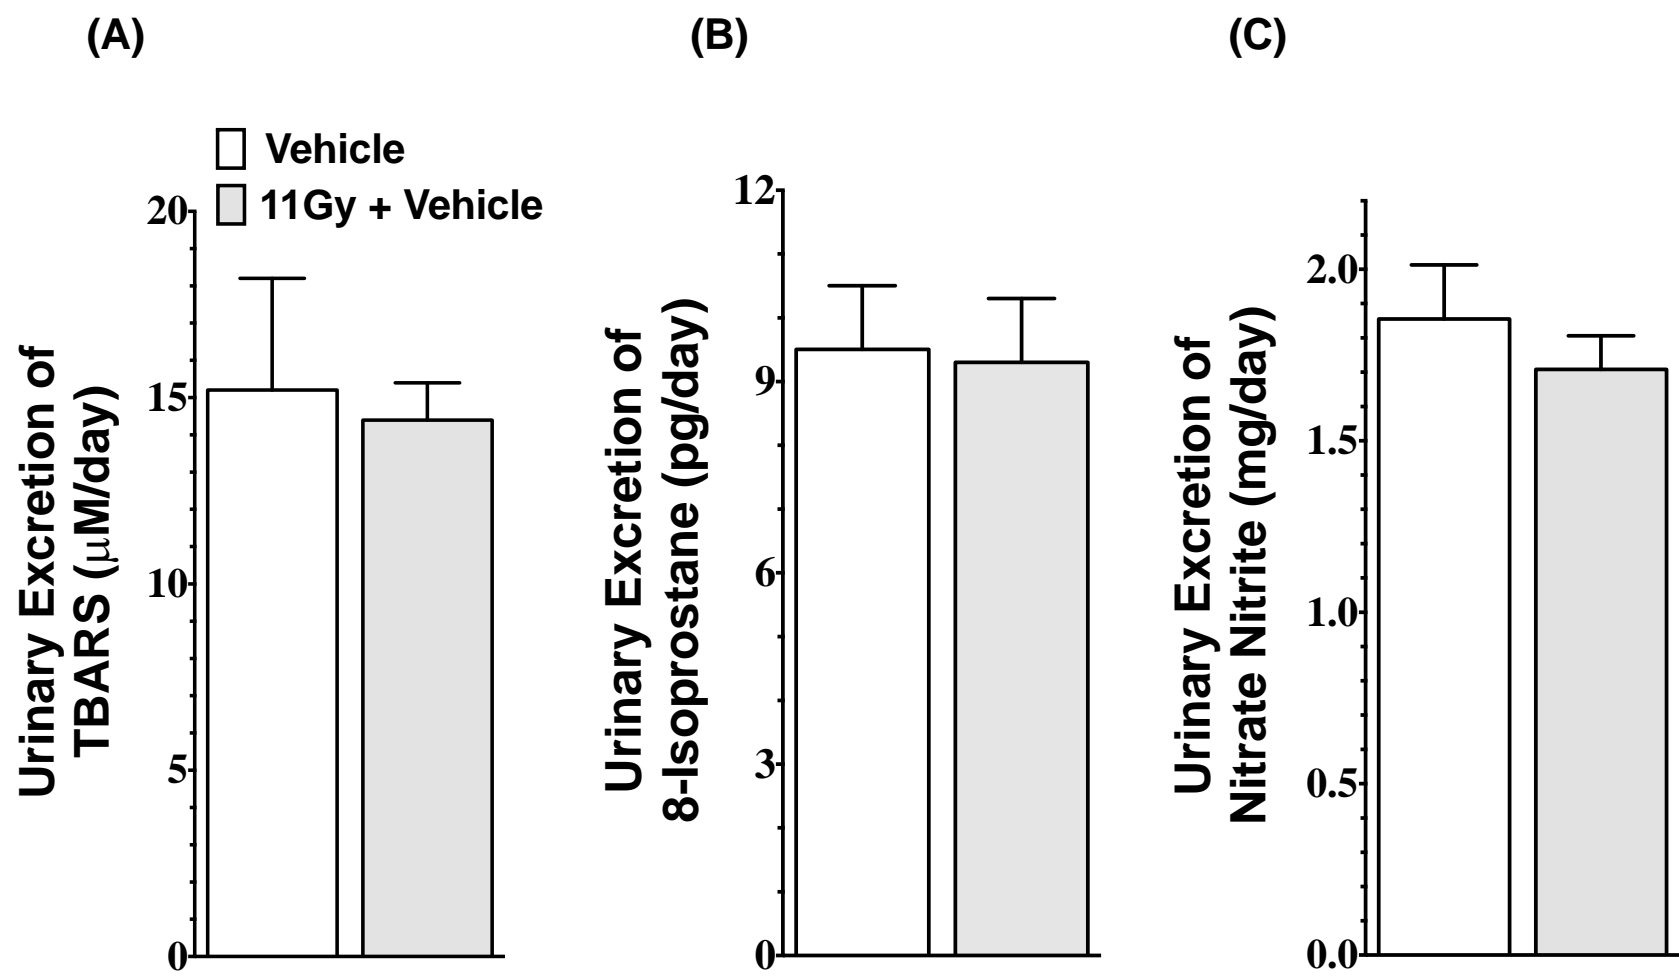

**Fig. S6**

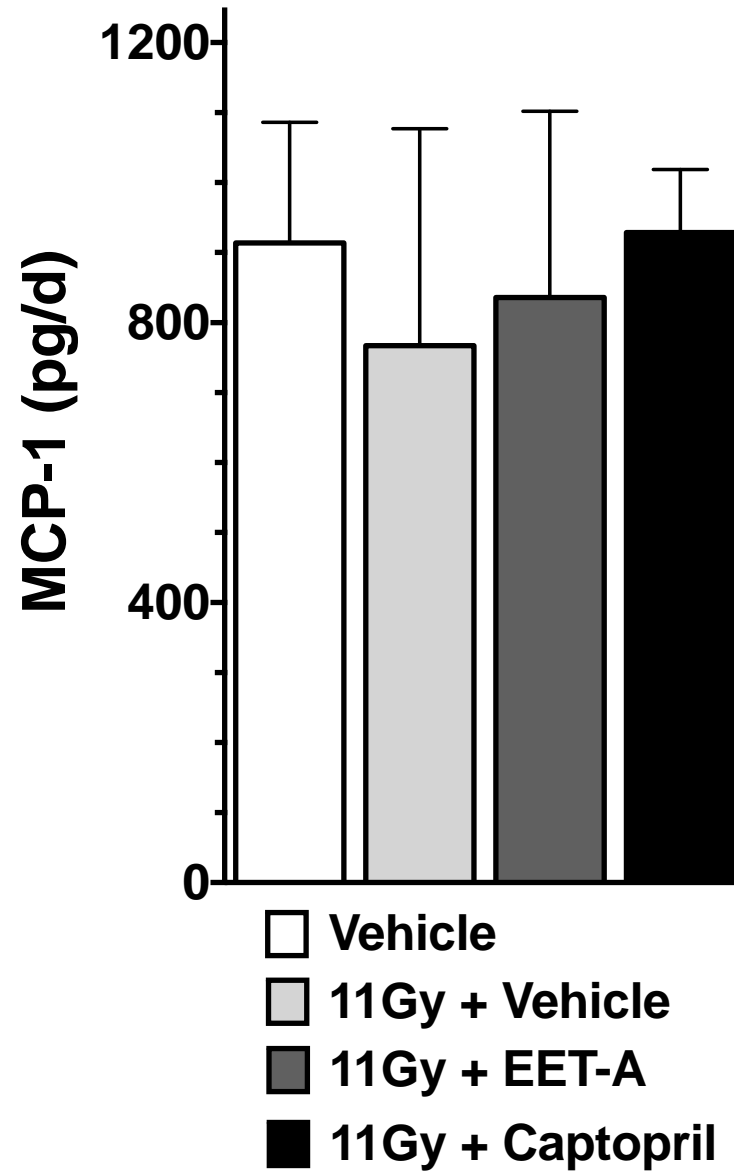

Fig. S7

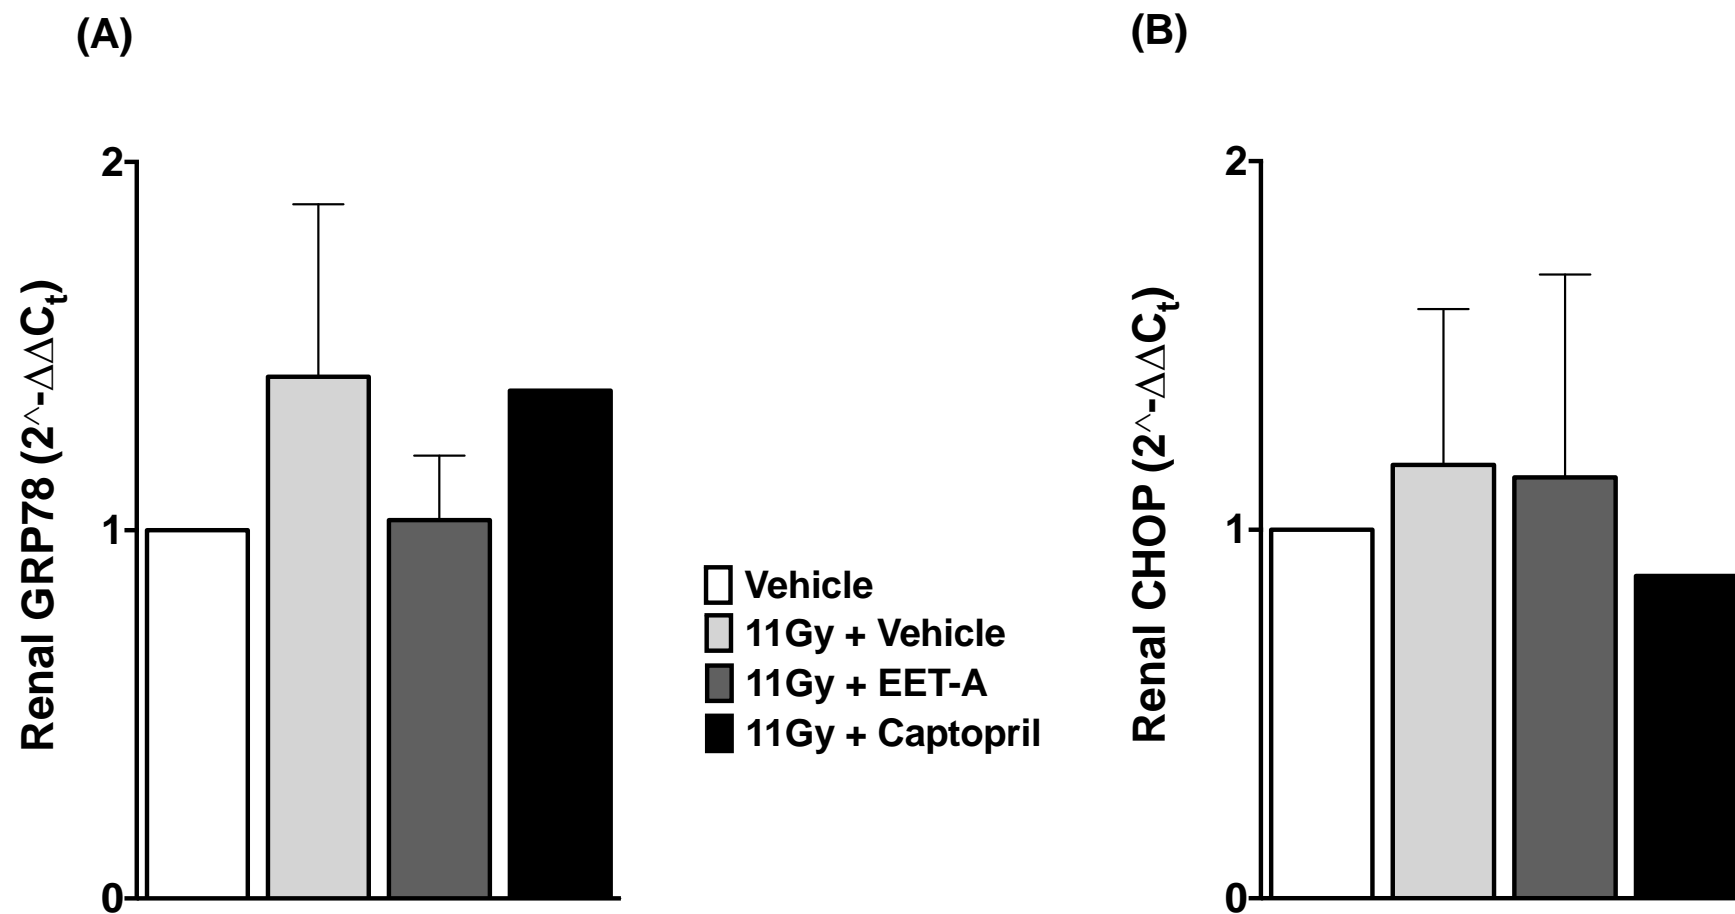

Supplement: NIHMS814115-supplement-01.pdf [file NIHMS814115-supplement-01.pdf]
